# Supplementary material for: A novel low density metal–organic framework with pcu topology by dendritic ligand
Source: Royal Society of Chemistry journal article supplement (doi:10.1039/c1cc12891d), 2011-01-01
Supplement: c1cc12891d.pdf [file c1cc12891d.pdf]

## Electronic Supplementary Information for

### **A novel low density metal-organic framework with pcu topology by dendritic ligand**

**Jiangtao Jia,<sup>a</sup> Fuxing Sun,<sup>a</sup> Qianrong Fang,<sup>a</sup> Xiaoqiang Liang,<sup>a</sup> Kun Cai,<sup>a</sup> Zheng Bian,<sup>\*b</sup> Huijun Zhao,<sup>c</sup> Lianxun Gao,<sup>b</sup> and Guangshan Zhu<sup>\*a</sup>**

*State Key Laboratory of Inorganic Synthesis and Preparative Chemistry, College of Chemistry, Jilin University, Changchun 130012, China; State Key laboratory of Polymer Physics and Chemistry, Changchun Institute of Applied Chemistry, Chinese Academy of Sciences, Changchun 130022, China; Griffith School of Environment, Griffith University, Queensland, 4222, Australia.*

RECEIVED DATE (automatically inserted by publisher); E-mail: zhugs@jlu.edu.cn; bianzh@ciac.jl.cn

**Contents:** The preparation and characterization of the ligand and single crystal, TGA, PXRD, IR, NMR and other measurements.

**General Methods:** All the chemical reagents used were bought from commercial supplier without further purification, unless otherwise noted. Powder X-ray diffractions (XRD) were carried out on Scintag X1 diffractometer with Cu-K $\alpha$  ( $\lambda$  = 1.5418 Å) at 40 kV, 35 mA. The elemental analyses were carried out on a PerkinElmer 240C element analyzer. Fourier-Transform infrared spectras were got with a Nicolet Impact 410 FT-IR spectrometer where KBr disks dispersed with sample powders was used in the 4000–400 cm<sup>-1</sup> range. Thermogravimetric analysis (TGA) curve were collected on a Perkin-Elmer TGA 7 thermogravimetric analyzer with a heating rate of 10 °C/min at air. <sup>1</sup>H NMR and <sup>13</sup>C NMR spectra were collected using a Bruker AV 400 or VARIAN 300 spectrometer at 298 K. Tetramethylsilane (TMS) of internal standard in <sup>1</sup>H NMR experiments was used, and deuterated solvents as internal standard in <sup>13</sup>C NMR experiments (CDCl<sub>3</sub>,  $\delta$  = 77.00 ppm; D<sub>6</sub>-DMSO,  $\delta$  = 39.52 ppm). Nitrogen and hydrogen adsorption experiments were performed with Autosorb-iQ2-MP-AG. High resolution mass spectra (HRMS) were collected using a FT-ICR-MS instrument (model: IonSpec 7.0T).

### **Synthesis of the Ligand and JUC-100:**

#### **Dimethyl 5'-bromo-[1,1':3',1''-terphenyl]-4,4''-dicarboxylate (1):**

1,3,5-Tribrombenzene (5.0 g, 16 mmol), *p*-methoxyl-carbonphenylboronic acid (7.2 g, 40 mmol), Na<sub>2</sub>CO<sub>3</sub> (8.4 g, 79 mmol), Pd(PPh<sub>3</sub>)<sub>4</sub> (1.3 g, 1.1 mmol) were added to a three-necked flask with degassed toluene-methanol-water (80 ml: 40 ml: 40 ml). The solution was stirred under nitrogen atmosphere for 50 h with reflux. The product was extracted using dichloromethane (80 ml  $\times$  3), washed with brine (80 ml), and dried with anhydrous MgSO<sub>4</sub>. The filtered solution was eliminated under reduced pressure. The residue was purified using column chromatography of silica gel (dichloromethane/ petroleum = 1/ 2, v/ v) to obtain compound **1** of 2.5 g (yield: 37%). <sup>1</sup>H NMR (CDCl<sub>3</sub>) 8.15 (d, 4 H, *J* = 8.0 Hz), 7.78 (s, 2 H), 7.75 (s, 1 H), 7.69 (d, 4 H, *J* = 8.0 Hz), 3.96 (s, 6 H).

#### **Dimethyl 5'-pinacolatoborontel-[1,1':3',1''-terphenyl]- 4,4''-dicarboxylate (2):**

Compound **1** (2.3 g, 5.3 mmol), bis(pinacolato)diboron (1.4 g, 5.7 mmol), KOAc (4.0 g, 40 mmol), and Pd(dppf)Cl<sub>2</sub> (0.12 g, 0.16 mmol) were added to a three-necked flask

with degassed 100ml 1,2-dimethoxyethane (DME). The solution was stirred for 3 h with reflux to get the product which was eliminated under reduced pressure. The residue was extracted using dichloromethane (80 ml  $\times$  3), washed with brine and dried with anhydrous  $\text{MgSO}_4$ . The filtered solution was eliminated under reduced pressure. The residue was purified using column chromatography of silica gel (dichloromethane/ petroleum = 1/ 1, v/ v) to obtain **2** of 2.0 g (yield: 78%).  $^1\text{H}$  NMR ( $\text{CDCl}_3$ ), 8.13 (d, 4 H  $J$  = 8.2 Hz), 8.09 (d, 2 H,  $J$  = 6.0 Hz), 7.94 (t, 1 H,  $J$  = 2.0Hz), 7.76 (d, 4 H,  $J$  = 8.2 Hz), 3.95 (s, 6 H), 1.39 (s, 12 H);  $^{13}\text{C}$  NMR ( $\text{CDCl}_3$ ) 166.953, 145.225, 140.147, 133.320, 130.066, 129.077, 128.956, 127.253, 84.162, 52.125, 24.877

**1,3,5-Tri(3,5-di(4-methoxycarboxyphenyl-1-yl)phenyl-1-yl)benzene (3):**

Compound **2** (2.0 g, 4.2 mmol), 1,3,5-tribromobenzene (0.31 g, 1.0 mmol),  $\text{Na}_2\text{CO}_3$  (0.53 g, 5.0 mmol) and  $\text{Pd}(\text{PPh}_3)_4$  (0.090 g, 0.076 mmol) were added to a three necked flask with degassed toluene-methanol-water (30 ml, 15 ml, 15 ml). The solution was stirred under nitrogen atmosphere for 50 h with reflux. The product was extracted using  $\text{CHCl}_3$  (80 ml  $\times$  3), washed with brine (80 ml), and dried with anhydrous  $\text{MgSO}_4$ . The filtered solution was eliminated under reduced pressure. The residue was purified using column chromatography with silica gel ( $\text{CHCl}_3$ / petroleum/  $\text{CH}_3\text{OH}$  = 50/ 10/ 1, v/ v/ v) to obtain **3** of 0.70 g (yield: 63%).  $^1\text{H}$  NMR ( $\text{CDCl}_3$ ) 8.162 (d, 12 H,  $J$  = 8 Hz), 7.980 (s, 3 H), 7.945 (s, 6 H), 7.888 (s, 3 H), 7.794 (d, 4 H,  $J$  = 12 Hz), 3.953 (s, 18 H)  $^{13}\text{C}$  NMR ( $\text{D}_6$ -DMSO) 166.832, 145.012, 142.488, 141.713, 132.298, 130.263, 129.488, 127.329, 126.264, 126.128, 125.839, 52.216.

**1,3,5-Tri(3,5-di(4-carboxyphenyl-1-yl)phenyl-1-yl)benzene (4, TDCPB) :**

Compound **3** (0.70 g, 0.63 mmol) and  $\text{NaOH}$  (2.0 g, 50 mmol) were added to a flask with THF-methanol-water (40ml:40ml:40ml). The solution was stirred for 24 h with reflux. After the solution was cool down, 1M  $\text{HCl}$  was added to it to get a solution with pH= 2.0. White precipitation was filtered to obtain **4** of 0.60 g (yield: 92%).  $^1\text{H}$  NMR ( $\text{D}_6$ -DMSO) 8.3513 (s, 3 H), 8.236 (s, 6 H), 8.107-8.057 (q, 18 H).  $^{13}\text{C}$  NMR ( $\text{D}_6$ -DMSO) 167.014, 14.165, 142.202, 141.784, 140.628, 129.892, 127.539, 126.266, 125.065. HRMS (ESI) ( $m/z$ ) calcd for  $\text{C}_{66}\text{H}_{42}\text{O}_{12}+\text{Na}$ : 1049.25685, found:

1049.26219.

**Zn<sub>4</sub>O(TDCPB) (JUC-100):** **4** (10 mg, 0.0097 mmol) and Zn(NO<sub>3</sub>)<sub>2</sub>·6H<sub>2</sub>O (20 mg, 0.067 mmol) were added to a solvent of DMF (3.0 ml), ethanol (0.20ml) and then 0.10 ml concentrated HNO<sub>3</sub> was added. After ultrasonic diffusion, the solution was heated at 85 °C for 24 h to obtain the product of 70% (yield based on Zn) with colorless crystal. Anal. Calcd (Found) for Zn<sub>4</sub>C<sub>96</sub>H<sub>116</sub>N<sub>10</sub>O<sub>28</sub>: C, 54.41 (54.88); H, 5.47(5.91); N, 6.61 (6.71) %. According to element analysis and TGA measurements, the crystal formula is Zn<sub>4</sub>O(TDCPB)·10DMF·5H<sub>2</sub>O.

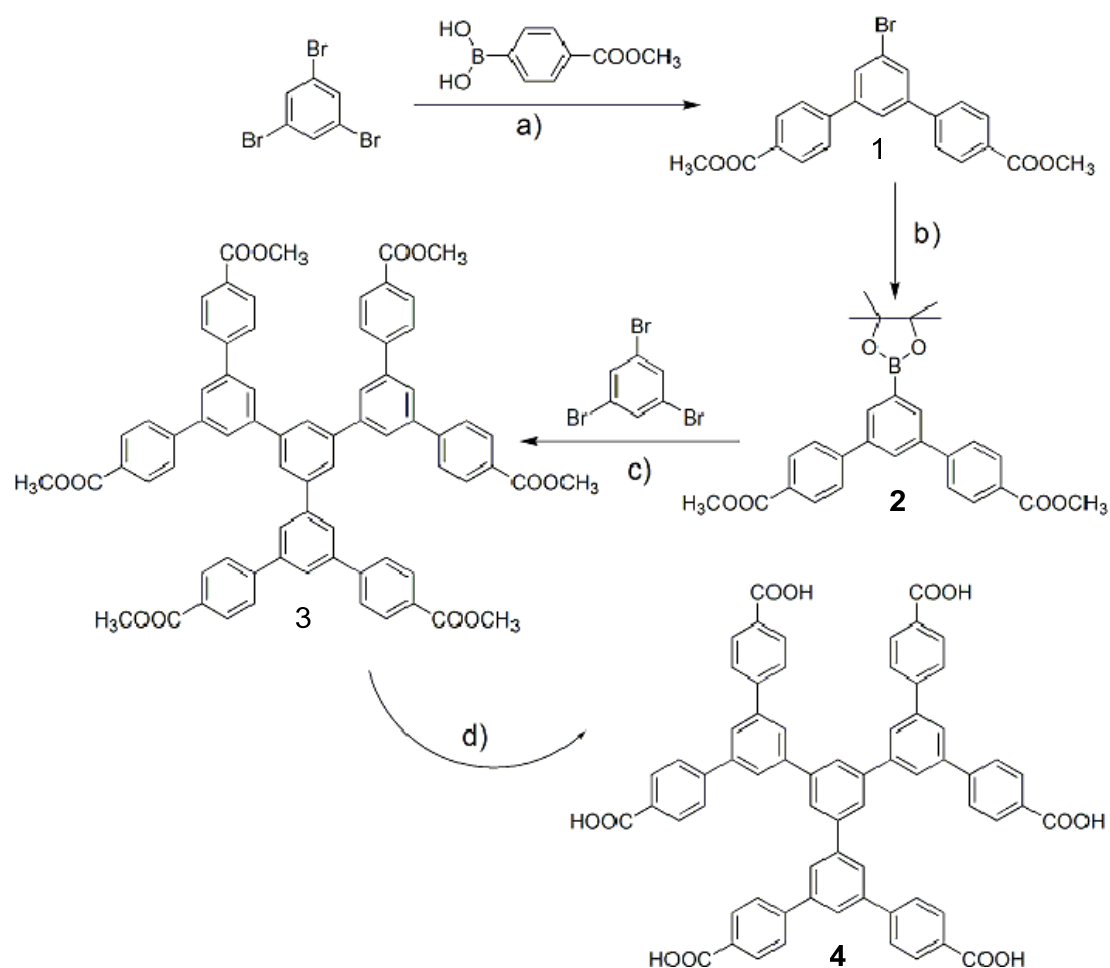

**Scheme 1:** The synthetic route of TDCPB

**Crystallography data:** Colorless, block-shaped crystal of JUC-100 was picked for X-ray structural analysis on a Bruker SMART CCD diffractometer at 296(2) K. The complex crystallized in the space group *R*-3*c*, trigonal, *a* = 20.4586(8), *b* = 20.4586(8), *c* =

80.370(3) Å,  $V = 29132(2)$  Å<sup>3</sup>,  $\lambda = 0.71073$  Å,  $\rho_{\text{calc}} = 0.888$  g/cm<sup>3</sup>. A total of 51924 reflections were collected, of which 6430 were unique ( $R_{\text{int}} = 0.0490$ ). Final  $GooF = 1.061$ ,  $R_1 = 0.0743$ ,  $wR_2 = 0.2258$ . The structure was solved and refined by full matrix least-squares on  $F^2$  values (SHELXL-97).<sup>[1]</sup> Non-hydrogen atoms were refined anisotropically. Hydrogen atoms were fixed at calculated positions and refined using a riding mode. The routine SQUEEZE was applied to the structures in order to remove diffuse electron density associated with badly disordered DMF molecules.<sup>[2]</sup>

**Low-pressure gas and vapor sorption measurements:** The JUC-100 sample after activation is used to N<sub>2</sub> adsorption measurement. The as-synthesized sample is soaked in CH<sub>2</sub>Cl<sub>2</sub> for 3 days and then heated at 135 °C and vacuum for 12 h. The N<sub>2</sub> and H<sub>2</sub> sorption-desorption experiments were performed on an Autosorb-iQ2-MP-AG machine. N<sub>2</sub> and H<sub>2</sub> used were of 99.999% purity. The sample was treated at 130 °C under vacuum for 12 h before the measurement. The H<sub>2</sub> sorption-desorption isotherms were collected at 77 K and 87 K. Surface area was determined by the N<sub>2</sub> gas isotherm measured at 77 K.

Reference:

- [1]. SHELX-97, Program for Structure Refinement, G. M. Sheldrick, University of Göttingen, Göttingen (Germany), 1997.
- [2]. A. L. Spek, *J. Appl. Crystallogr.*, 2003, **36**, 7.

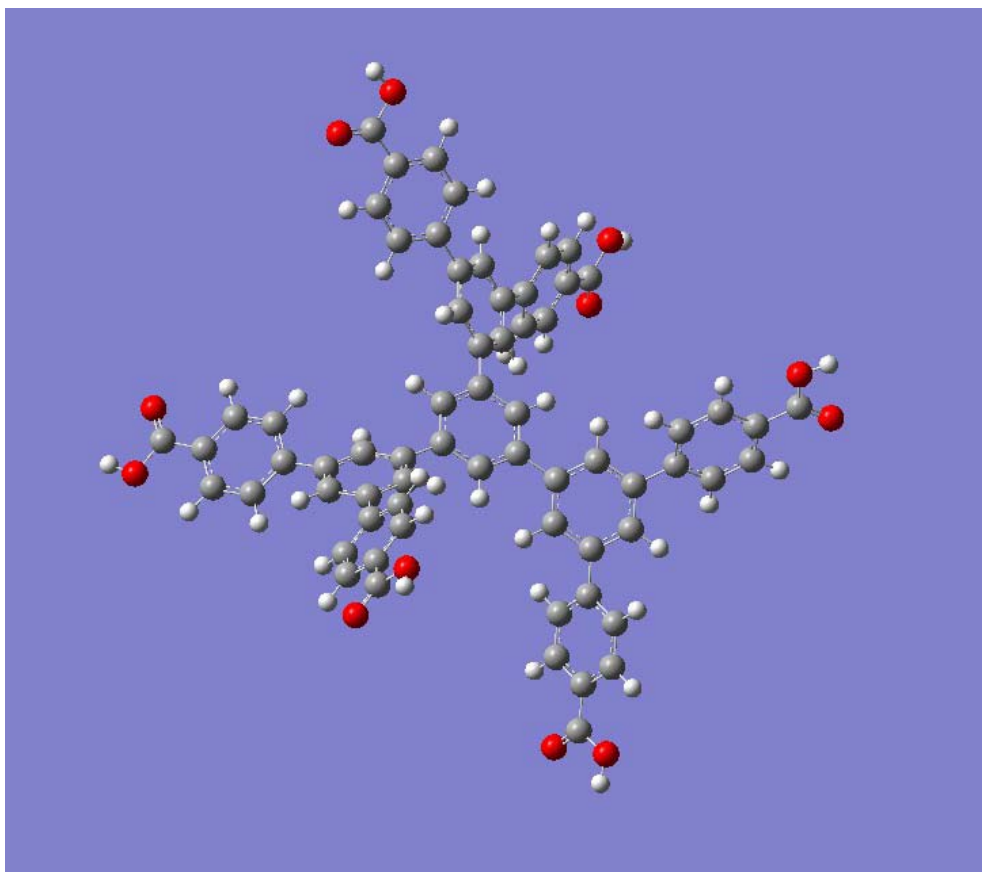

**Fig. S1** The optimized configuration of TDCPB: The configuration of TDCPB was optimized by DFT method with the software of Gaussian09. The density functional B3LYP level using the 6-31G(d) basis set was utilized for the geometry optimizations. After the calculation, we got the most optimized configuration as shown above and it just took a distorted octahedral configuration.

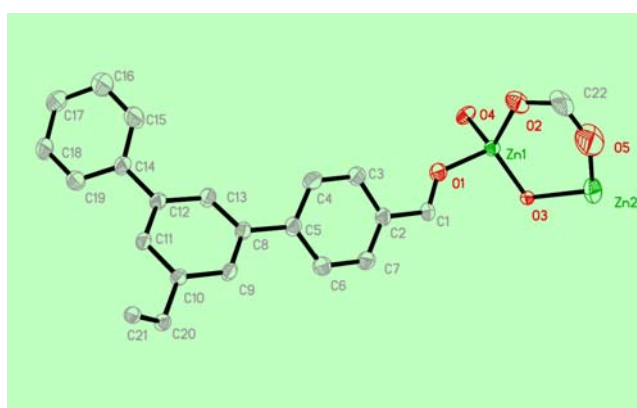

**Fig. S2** The asymmetric unit of JUC-100

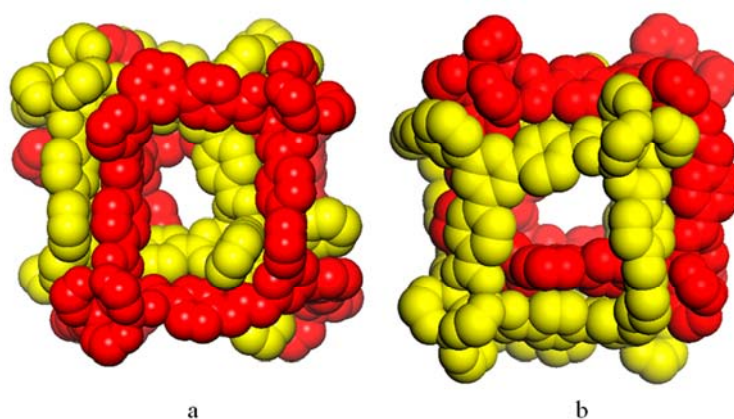

**Fig. S3** View outside (a) and inside (b) of the nanocage

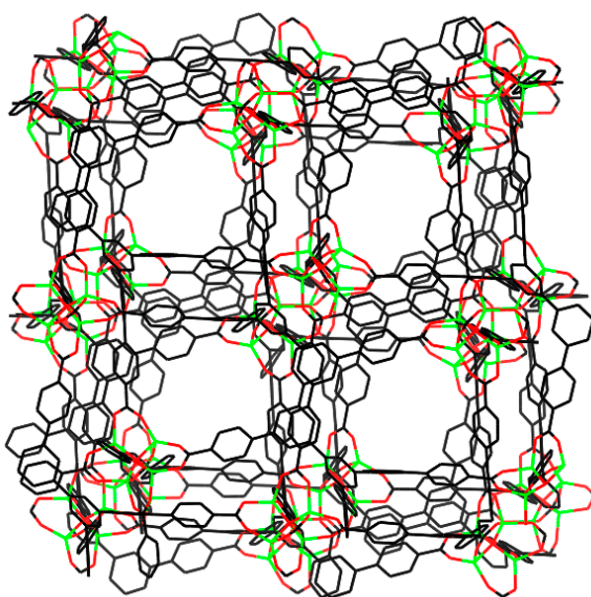

**Fig. S4** 3D space packing of JUC-100 view along (111)

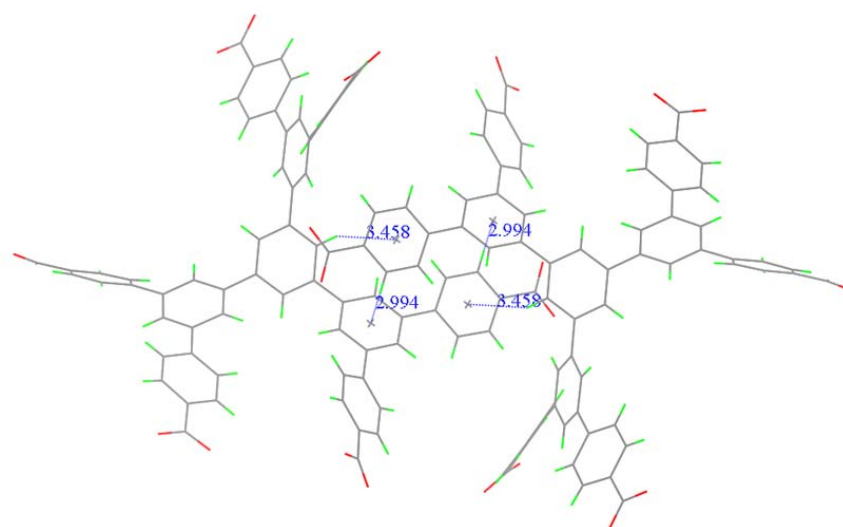

**Fig. S5** C-H $\cdots$  $\pi$  effect between ligands (C atom-black, O atom-red, H atom-green, distance (Å)-blue).

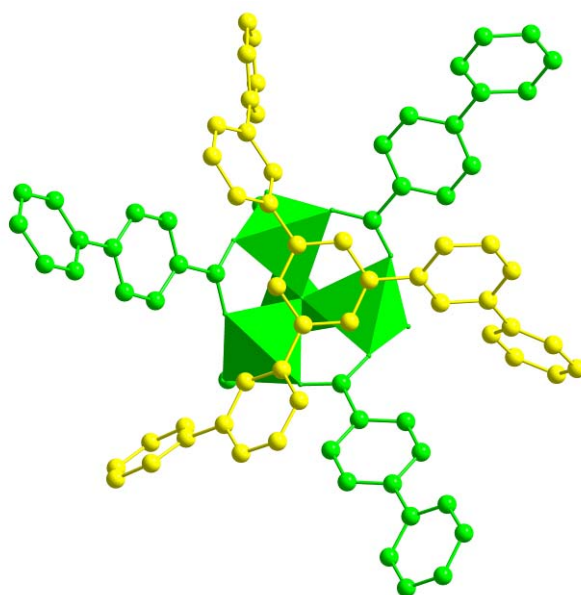

**Fig. S6** Staggered conformation between the ligand TDCPB and SBU Zn<sub>4</sub>O



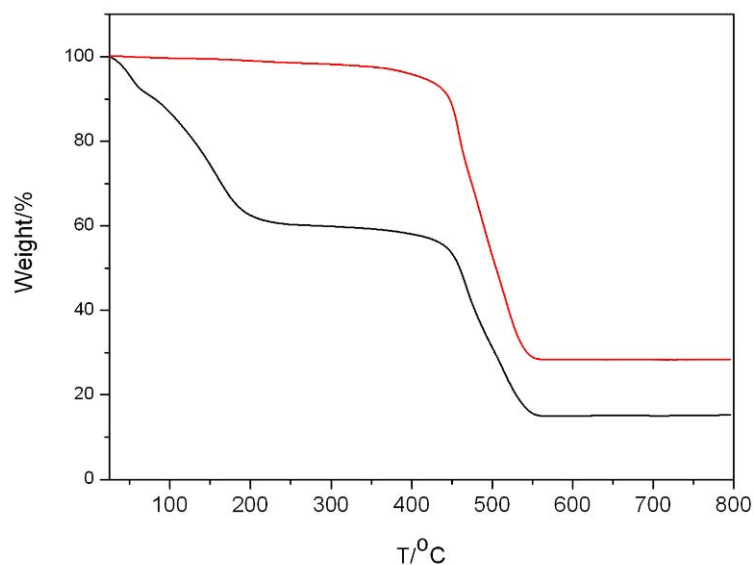

**Fig. S7** TGA curves of desolvated (red) and solvated (black) form of JUC-100. The desolvated sample starts to decompose at about 420 °C, and up to 550 °C, the decomposition finishes, and there is 70.44 % weight loss attributed to the destruction of organic part. The solvated sample starts to lose guests at the beginning of heat-up, and there is 41.14 % weight loss attributed to the departure of guests before 200 °C. Furthermore, this sample starts to decompose at about 420 °C, and the decomposition finishes up to 550 °C, and there is 43.66 % weight loss attributed to the loss of organic framework part.

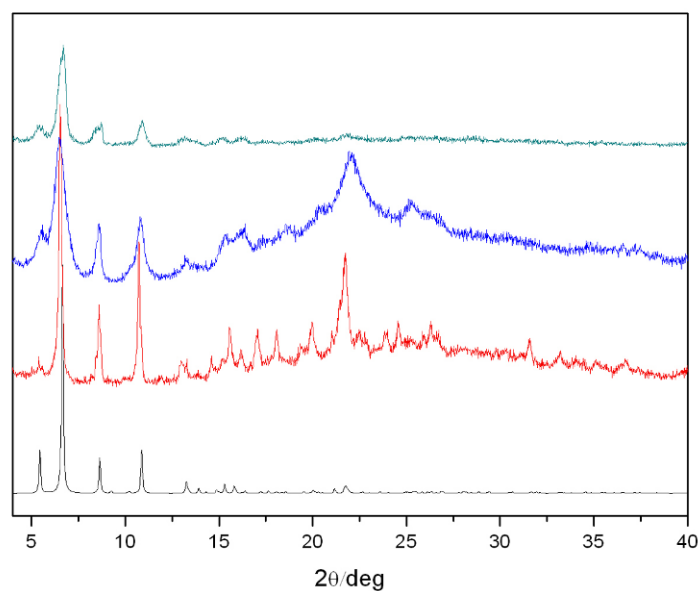

**Fig. S8** PXRD patterns of JUC-100 (calculated, black; as-synthesized, red; activated at 130 °C for 12 h, blue; heated at 300 °C for 2 h, green)

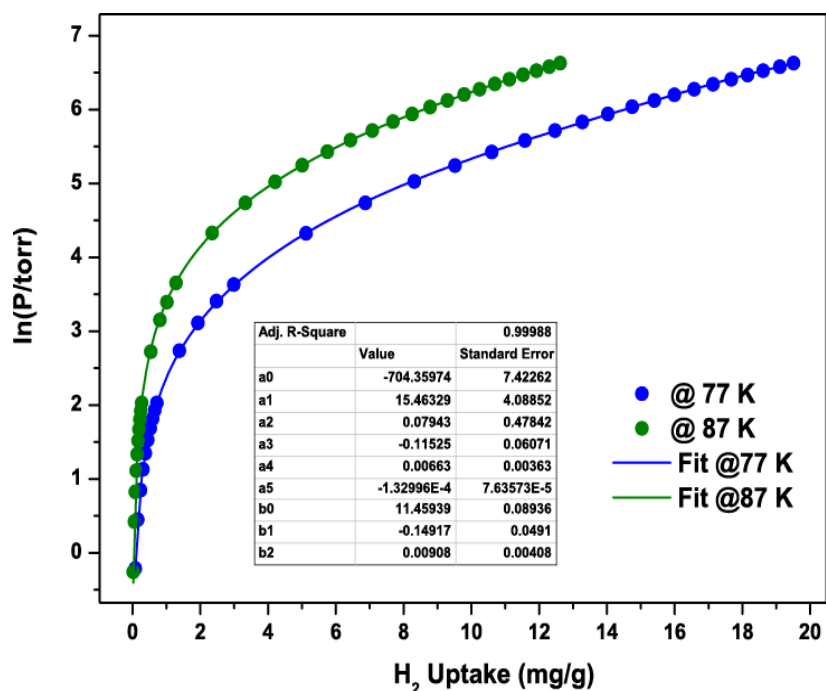

**Fig. S9** H<sub>2</sub> uptake data recorded at 77 K (blue) and 87 K (green) in JUC-100, and the corresponding virial curves fitted to the data. Inset: virial coefficients obtained from the fit of the data.

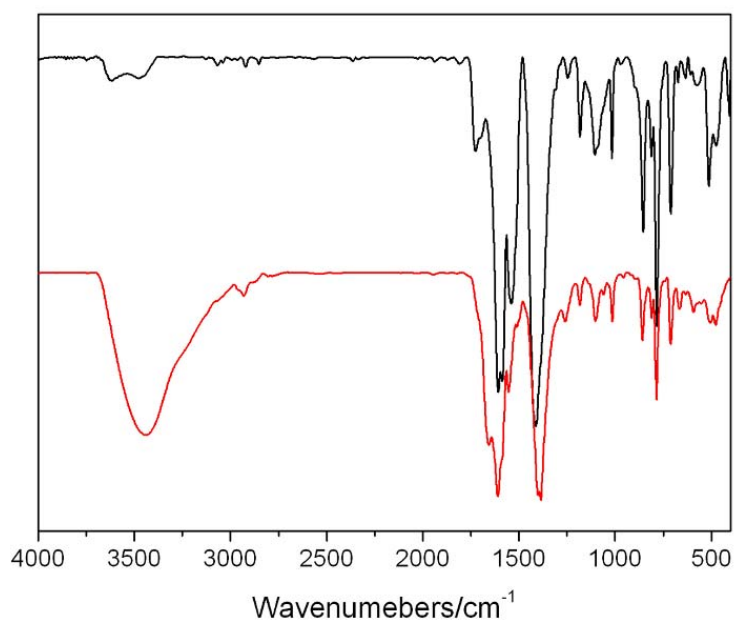

**Fig. S10** FT-IR spectra of desolvated (black) and solvated (red) form of JUC-100. The characteristic peak of C=O of DMF at 1664 cm<sup>-1</sup> was only found in the red curve, implying that the guest was removed completely.

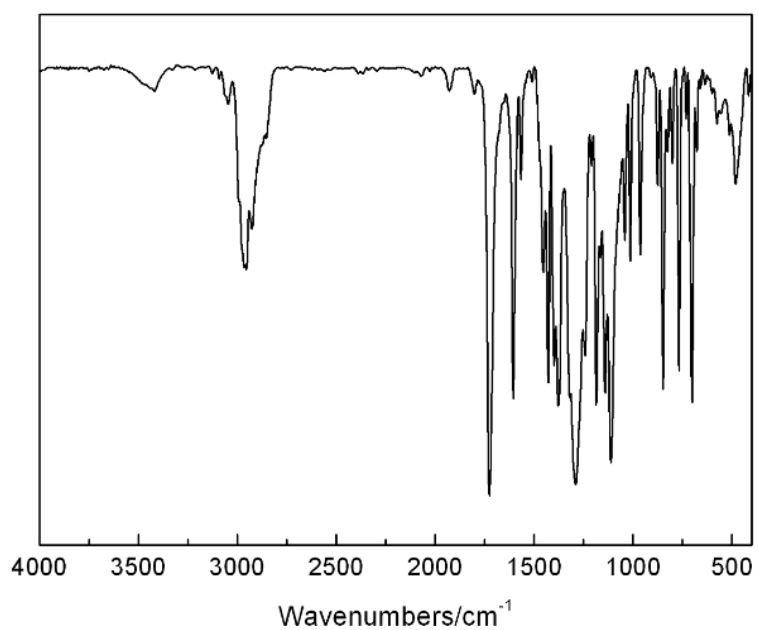

**Fig. S11** FT-IR spectra of compound **2**

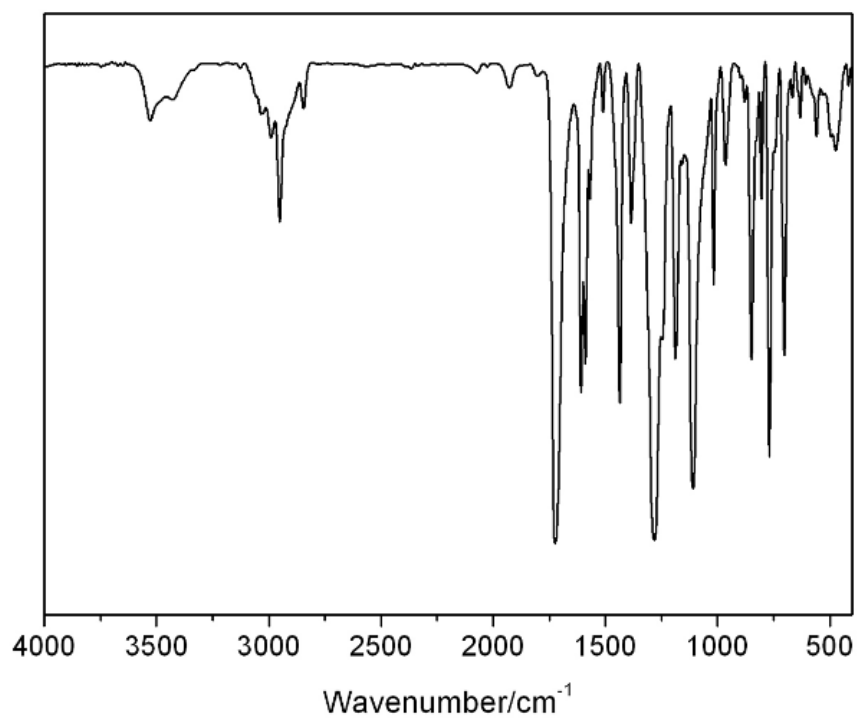

**Fig. S12** FT-IR spectra of compound **3**

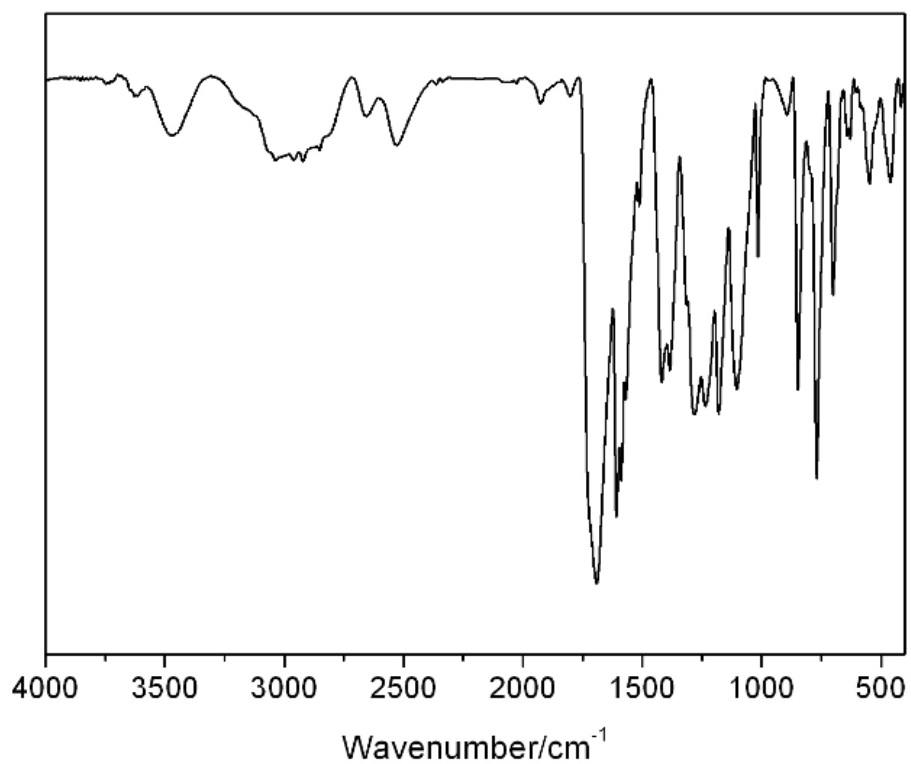

**Fig. S13** FT-IR spectra of compound **4**

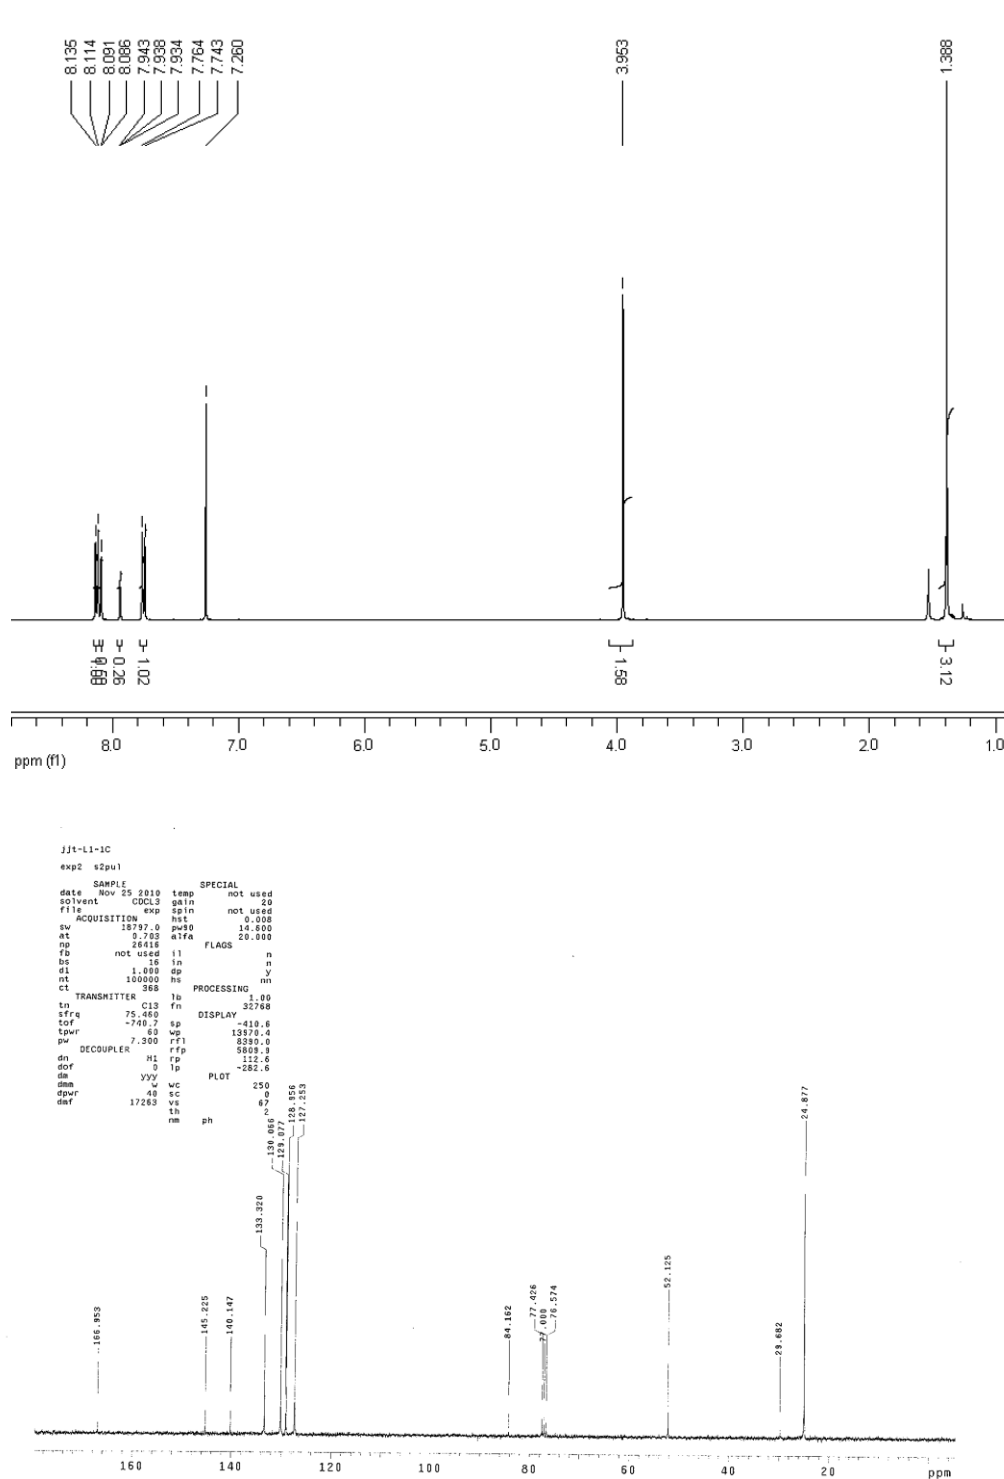

**Fig. S14**  $^1\text{H}$  and  $^{13}\text{C}$  NMR spectra of compound **2** recorded in neat  $\text{CDCl}_3$ .

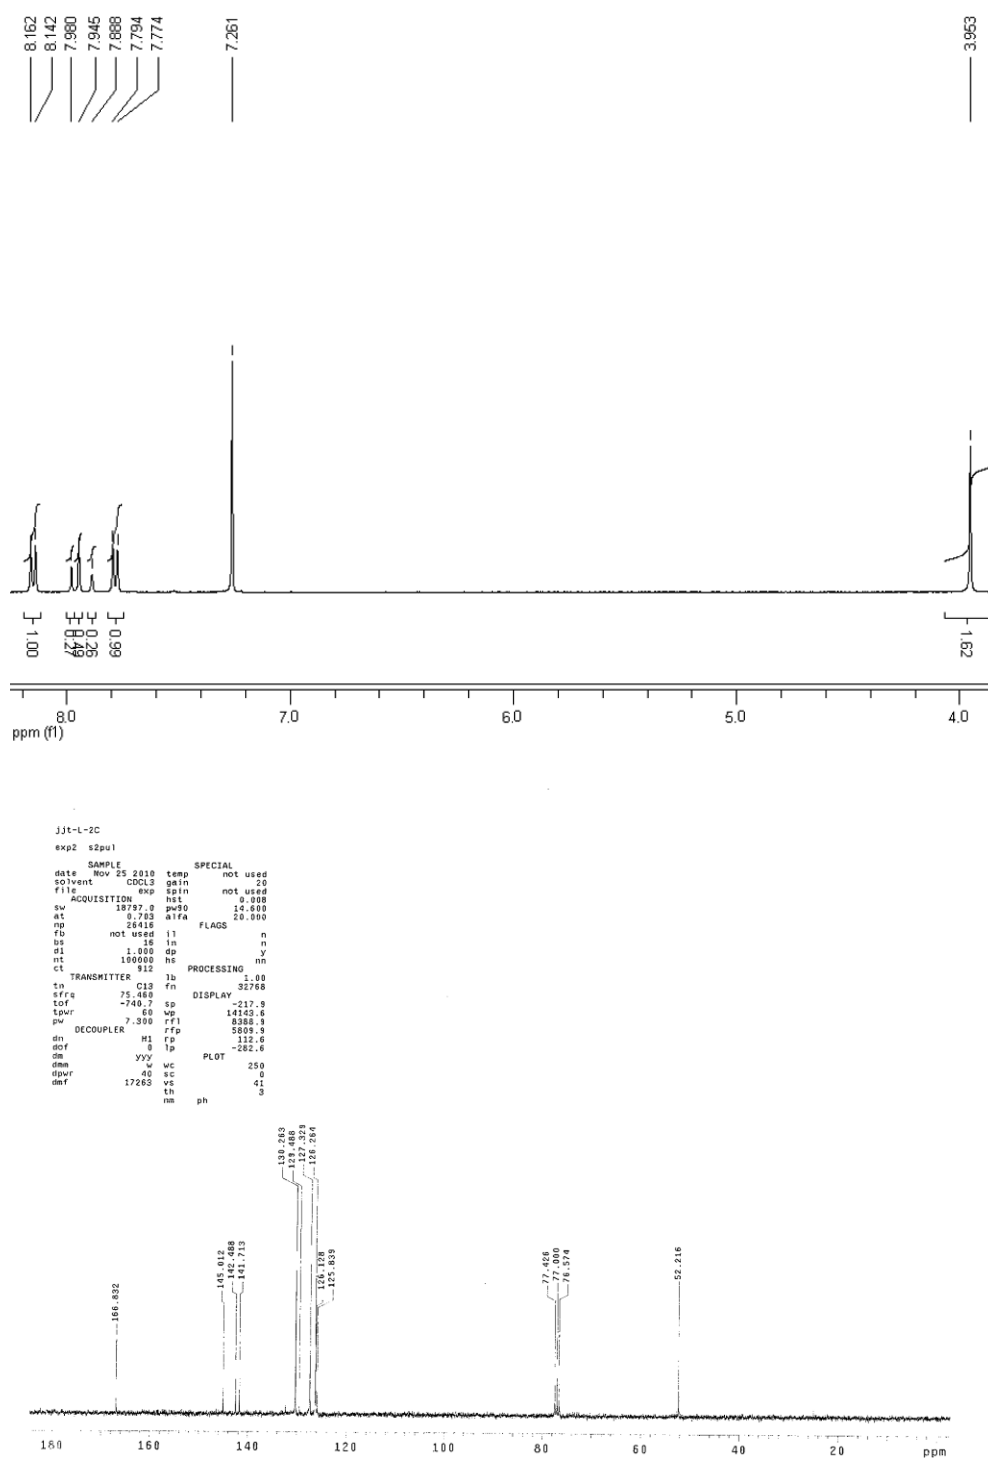

Fig. S15  $^1\text{H}$  and  $^{13}\text{C}$  NMR spectra of compound **3** recorded in neat  $\text{CDCl}_3$ .

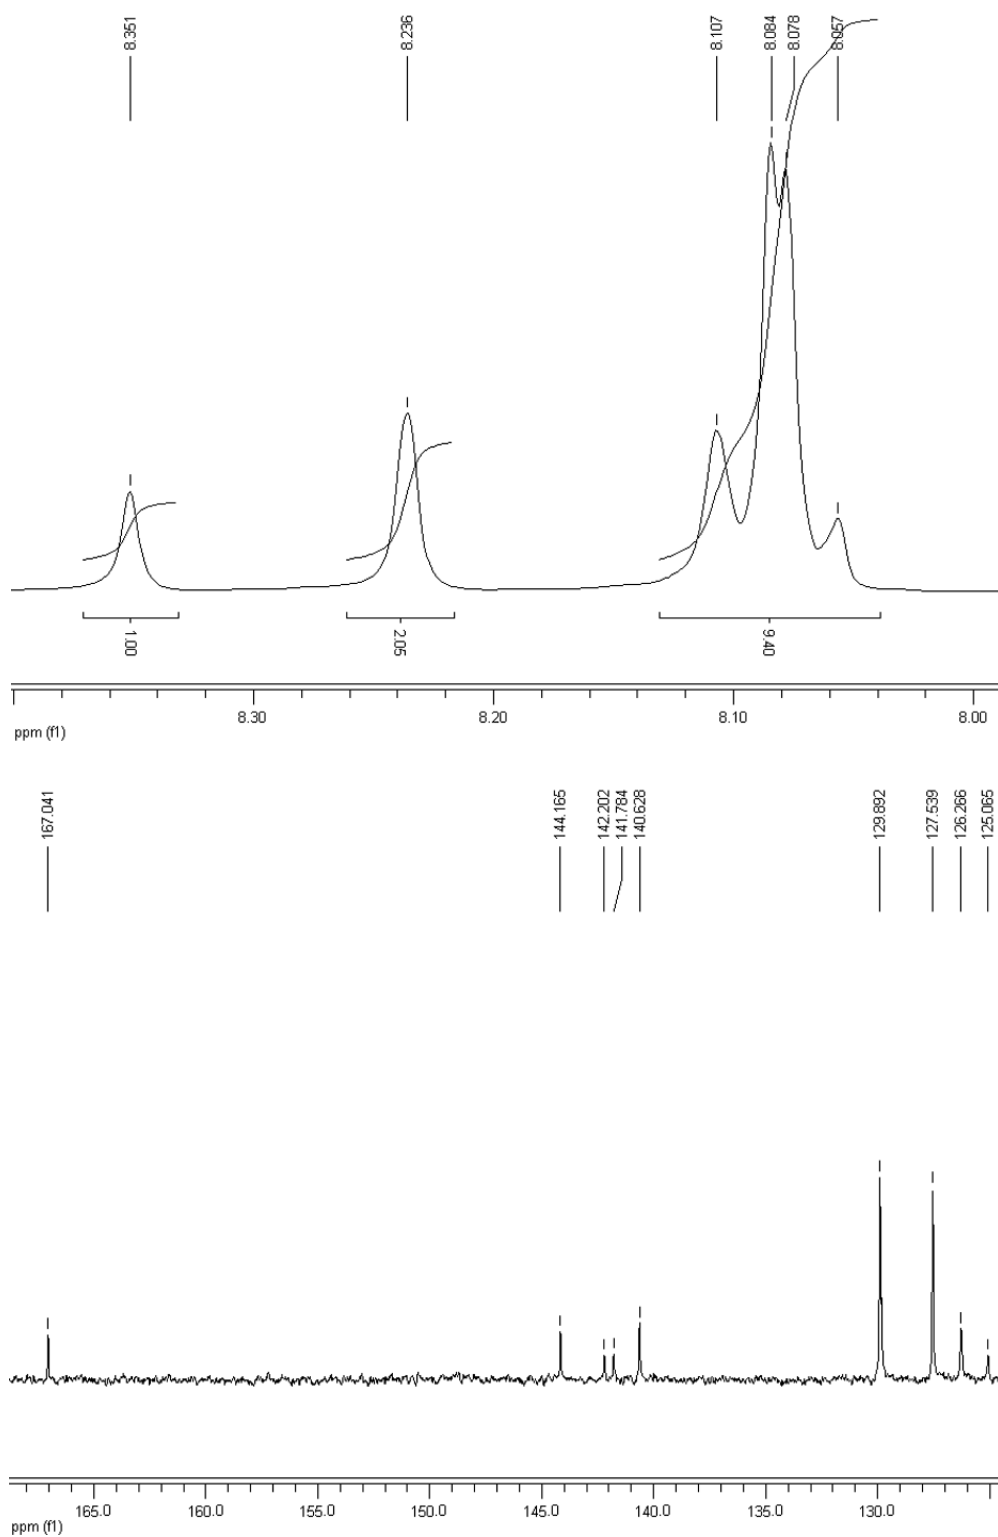

**Fig. S16** <sup>1</sup>H and <sup>13</sup>C NMR spectra of compound **4** recorded in neat D<sub>6</sub>-DMSO.

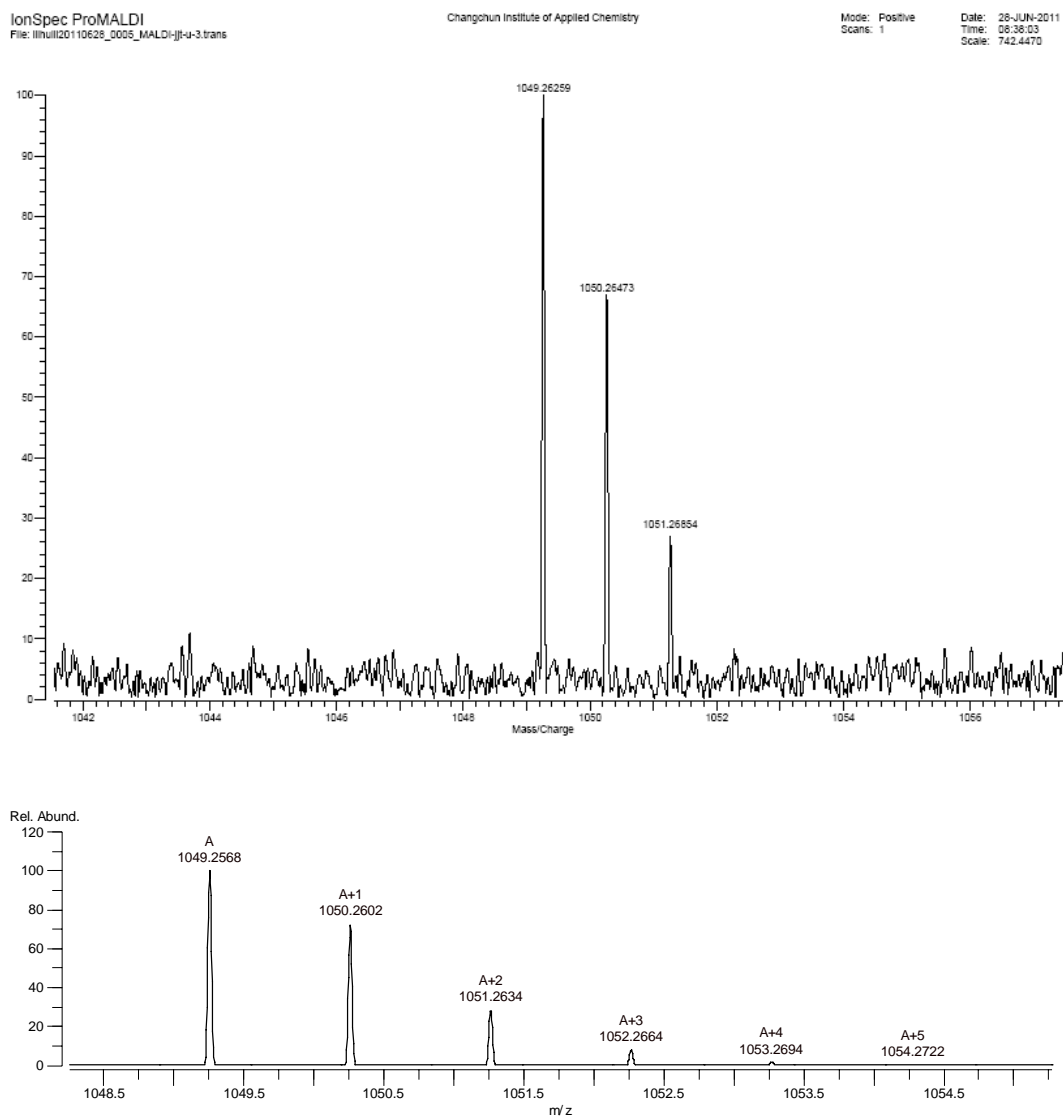

**Fig. S17** The HRMS spectra of ligand TDCPB (top: measured; bottom: calculated).
